# Supplementary material for: Polycyclic pyrroloindoline-containing natural products with a unique 3-heptyl-2a,4a-diazapentaleno[1,6-ab]indene core isolated from Alstonia scholaris
Source: Royal Society of Chemistry journal article supplement (doi:10.1039/d3ob01637d), 2023-11-28
Supplement: d3ob01637d1.pdf [file d3ob01637d1.pdf]

## Supporting Information for

### Polycyclic pyrroloindoline-containing natural product with unprecedented hexahydro-2a,4a-diazapentaleno[1,6-ab]indene core from *Alstonia scholaris*

Guanqun Zhan,<sup>§</sup> Fuxin Zhang,<sup>§</sup> Kailing Yang, Tao Yang, Ruixi Zhou, Xueqing Ma, Nan Wang, Zengjun Guo\*

School of Pharmacy, Health Science Center, Xi'an Jiaotong University, Xi'an 710061, P. R. China

#### List of Supplementary Data

|                                                                                                                                                                  |    |
|------------------------------------------------------------------------------------------------------------------------------------------------------------------|----|
| <b>1. Computational calculations section</b> .....                                                                                                               | 3  |
| 1.1 Conformational analysis and structure optimization.....                                                                                                      | 3  |
| Table S1 Energies of molecule 1a at M062X/6-31G(d) level.....                                                                                                    | 3  |
| Table S2 Energies of molecule 1b at M062X/6-31G(d) level. ....                                                                                                   | 4  |
| Table S3 Energies of molecule 1c at M062X/6-31G(d) level.....                                                                                                    | 4  |
| Table S4 Energies of molecule 1d at M062X/6-31G(d) level. ....                                                                                                   | 4  |
| 1.2 NMR calculation .....                                                                                                                                        | 5  |
| Table S5 Experimental and calculated <sup>13</sup> C NMR of 1a .....                                                                                             | 6  |
| Table S6 Experimental and calculated <sup>13</sup> C NMR of 1b .....                                                                                             | 6  |
| Table S7 Experimental and calculated <sup>13</sup> C NMR of 1c .....                                                                                             | 8  |
| Table S8 Experimental and calculated <sup>13</sup> C NMR of 1d .....                                                                                             | 9  |
| Table S9. Related parameters of <sup>13</sup> C NMR calculations and DP4 <sup>+</sup> analysis for four potential isomers of 1 .....                             | 10 |
| 1.3 ECD calculation .....                                                                                                                                        | 10 |
| <b>Table S10</b> Anti-inflammatory activity of compounds <b>1-5</b> on NO production in LPS-induced RAW264.7 mouse macrophages and the cell survival rates. .... | 10 |
| <b>Figure S1</b> The isolated known PiNPs from <i>Alstonia scholaris</i> .....                                                                                   | 11 |
| <b>Figure S2.</b> (+)-HR-ESI-MS spectrum of <b>1</b> .....                                                                                                       | 11 |
| <b>Figure S3.</b> UV spectrum of <b>1</b> in MeOH .....                                                                                                          | 11 |
| <b>Figure S4.</b> ECD spectrum of <b>1</b> in MeOH .....                                                                                                         | 12 |
| <b>Figure S5.</b> IR spectrum of <b>1</b> .....                                                                                                                  | 12 |
| <b>Figure S6.</b> <sup>1</sup> H NMR (600 MHz) spectrum of <b>1</b> in CD <sub>3</sub> OD .....                                                                  | 13 |

|                                                                                                                     |    |
|---------------------------------------------------------------------------------------------------------------------|----|
| <b>Figure S7.</b> $^{13}\text{C}$ NMR (150 MHz) spectrum of <b>1</b> in $\text{CD}_3\text{OD}$ .....                | 13 |
| <b>Figure S8.</b> DEPT 135 spectrum of <b>1</b> in $\text{CD}_3\text{OD}$ .....                                     | 14 |
| <b>Figure S9.</b> HSQC spectrum of <b>1</b> in $\text{CD}_3\text{OD}$ .....                                         | 14 |
| <b>Figure S10.</b> HMBC spectrum of <b>1</b> in $\text{CD}_3\text{OD}$ .....                                        | 15 |
| <b>Figure S11.</b> Locally amplified HMBC spectrum (from 6.75 to 7.35) of <b>1</b> in $\text{CD}_3\text{OD}$ .....  | 15 |
| <b>Figure S12.</b> Locally amplified HMBC spectrum (from 4.55 to 5.20) of <b>1</b> in $\text{CD}_3\text{OD}$ .....  | 16 |
| <b>Figure S13.</b> Locally amplified HMBC spectrum (from 2.10 to 3.60) of <b>1</b> in $\text{CD}_3\text{OD}$ .....  | 16 |
| <b>Figure S14.</b> $^1\text{H}$ - $^1\text{H}$ COSY spectrum of <b>1</b> in $\text{CD}_3\text{OD}$ .....            | 17 |
| <b>Figure S15.</b> NOESY spectrum of <b>1</b> in $\text{CD}_3\text{OD}$ .....                                       | 17 |
| <b>Figure S17.</b> Locally amplified NOESY spectrum (from 4.72 to 4.74) of <b>1</b> in $\text{CD}_3\text{OD}$ ..... | 18 |
| <b>Figure S18.</b> Locally amplified NOESY spectrum (from 3.40 to 3.47) of <b>1</b> in $\text{CD}_3\text{OD}$ ..... | 19 |
| <b>Figure S19.</b> Locally amplified NOESY spectrum (from 0.90 to 3.22) of <b>1</b> in $\text{CD}_3\text{OD}$ ..... | 19 |

# 1. Computational calculations section

## 1.1 Conformational analysis and structure optimization

Conformational analysis was performed using OpenBabel with genetic algorithm at MMFF94 force field for the configurations of the calculated compounds.<sup>1</sup> The conformers of each configuration were then optimized with the software package Gaussian 09 at the M062X/6-31G(d) level.<sup>2</sup> Room-temperature equilibrium populations were calculated according to Boltzmann distribution law:

$$\frac{N_i}{N} = \frac{g_i e^{-\frac{E_i}{k_B T}}}{\sum g_i e^{-\frac{E_i}{k_B T}}}$$

where  $N_i$  is the number of conformer  $i$  with energy  $E_i$  and degeneracy  $g_i$  at temperature  $T$ , and  $k_B$  is Boltzmann constant.

**Table S1** Energies of molecule **1a** at M062X/6-31G(d) level.

| Conformers | Energy (Hartree) | Population (%) |
|------------|------------------|----------------|
| 1a-1       | -1113.678594     | 1.17           |
| 1a-2       | -1113.679985     | 5.13           |
| 1a-3       | -1113.678694     | 1.30           |
| 1a-4       | -1113.678897     | 1.62           |
| 1a-5       | -1113.679382     | 2.71           |
| 1a-7       | -1113.679557     | 3.26           |
| 1a-9       | -1113.680908     | 13.65          |
| 1a-10      | -1113.679105     | 2.02           |
| 1a-11      | -1113.67987      | 4.54           |
| 1a-15      | -1113.679609     | 3.44           |
| 1a-16      | -1113.681264     | 19.89          |
| 1a-19      | -1113.681154     | 17.70          |
| 1a-20      | -1113.679073     | 1.95           |
| 1a-24      | -1113.679291     | 2.46           |

1 O'Boyle, N. M.; Banck, M.; James, C. A.; Morley, C.; Vandermeersch, T.; Hutchison, G. R. *J. Cheminformatics* 2011, 3, 33.

2 Frisch, M. J.; Trucks, G. W.; Schlegel, H. B.; Scuseria, G. E.; Robb, M. A.; Cheeseman, J. R.; Scalmani, G.; Barone, V.; Mennucci, B.; Petersson, G. A.; Nakatsuji, H.; Caricato, M.; Li, X.; Hratchian, H. P.; Izmaylov, A. F.; Bloino, J.; Zheng, G.; Sonnenberg, J. L.; Hada, M.; Ehara, M.; Toyota, K.; Fukuda, R.; Hasegawa, J.; Ishida, M.; Nakajima, T.; Honda, Y.; Kitao, O.; Nakai, H.; Vreven, T.; Montgomery Jr, J. A.; Peralta, J. E.; Ogliaro, F.; Bearpark, M.; Heyd, J. J.; Brothers, E.; Kudin, K. N.; Staroverov, V. N.; Kobayashi, R.; Normand, J.; Raghavachari, K.; Rendell, A.; Burant, J. C.; Iyengar, S. S.; Tomasi, J.; Cossi, M.; Rega, N.; Millam, J. M.; Klene, M.; Knox, J. E.; Cross, J. B.; Bakken, V.; Adamo, C.; Jaramillo, J.; Gomperts, R.; Stratmann, R. E.; Yazyev, O.; Austin, A. J.; Cammi, R.; Pomelli, C.; Ochterski, J. W.; Martin, R. L.; Morokuma, K.; Zakrzewski, V. G.; Voth, G. A.; Salvador, P.; Dannenberg, J. J.; Dapprich, S.; Daniels, A. D.; Farkas, O.; Foresman, J. B.; Ortiz, J. V.; Cioslowski, J.; Fox, D. J. *Gaussian 09 Revision D.01*. Gaussian Inc. Wallingford CT **2009**.

|       |              |      |
|-------|--------------|------|
| 1a-29 | -1113.678973 | 1.76 |
| 1a-32 | -1113.681137 | 17.4 |

**Table S2** Energies of molecule **1b** at M062X/6-31G(d) level.

| Conformers | Energy (Hartree) | Population (%) |
|------------|------------------|----------------|
| 1b-1       | -1113.631503     | 2.91           |
| 1b-2       | -1113.633912     | 37.43          |
| 1b-3       | -1113.631791     | 3.95           |
| 1b-13      | -1113.631641     | 3.37           |
| 1b-15      | -1113.633863     | 35.51          |
| 1b-18      | -1113.631841     | 4.16           |
| 1b-20      | -1113.631794     | 3.96           |
| 1b-28      | -1113.631301     | 2.35           |
| 1b-45      | -1113.631298     | 2.34           |
| 1b-47      | -1113.631808     | 4.02           |

**Table S3** Energies of molecule **1c** at M062X/6-31G(d) level.

| Conformers | Energy (Hartree) | Population (%) |
|------------|------------------|----------------|
| 1c-1       | -1113.630746     | 3.62           |
| 1c-2       | -1113.630745     | 3.61           |
| 1c-3       | -1113.631325     | 6.68           |
| 1c-4       | -1113.630164     | 1.95           |
| 1c-5       | -1113.630631     | 3.20           |
| 1c-6       | -1113.630011     | 1.66           |
| 1c-7       | -1113.629986     | 1.62           |
| 1c-9       | -1113.63063      | 3.20           |
| 1c-10      | -1113.630622     | 3.17           |
| 1c-11      | -1113.632036     | 14.19          |
| 1c-12      | -1113.631144     | 5.51           |
| 1c-16      | -1113.632093     | 15.08          |
| 1c-18      | -1113.631937     | 12.78          |
| 1c-19      | -1113.631713     | 10.08          |
| 1c-20      | -1113.631999     | 13.65          |

**Table S4** Energies of molecule **1d** at M062X/6-31G(d) level.

| Conformers | Energy (Hartree) | Population (%) |
|------------|------------------|----------------|
| 1d-1       | -1113.675        | 12.69          |

---

|       |           |       |
|-------|-----------|-------|
| 1d-3  | -1113.672 | 1.23  |
| 1d-4  | -113.673  | 1.67  |
| 1d-5  | -113.674  | 4.50  |
| 1d-6  | -113.674  | 11.08 |
| 1d-7  | -113.675  | 23.77 |
| 1d-10 | -113.674  | 5.18  |
| 1d-11 | -113.674  | 9.90  |
| 1d-12 | -113.674  | 4.98  |
| 1d-16 | -113.674  | 11.20 |
| 1d-19 | -113.674  | 10.38 |
| 1d-23 | -113.673  | 3.41  |

---

## 1.2 NMR calculation

NMR calculations were carried out by Gaussian 09 following the protocol adapted from Michael *et al.*<sup>3</sup> The theoretical calculation of NMR was conducted using the Gauge-Including Atomic Orbitals (GIAO) method at mPW1PW91/6-31G(d) by the SMD model. Finally, the calculated NMR chemical shift values were averaged according to Boltzmann distribution for each conformer and fitting to the experimental values by linear regression. DP4+ probability analysis was performed according to the reported methods.<sup>4</sup>

---

3. Michael, W. L.; Matthew, R. S.; Dean, J. T. *Chem. Rev.* **2012**, *112*, 1839–1862.

4 Grimblat, N.; Zanardi, M.M.; Sarotti, A.M. *J. Org. Chem.* **2015**, *80*, 12526–12534.

**Table S5** Experimental and calculated  $^{13}\text{C}$  NMR of **1a**

| No.                       | $\delta_{\text{expt.}}$ | $\delta_{\text{calcd-1a-1}}$ | $\delta_{\text{calcd-1a-2}}$ | $\delta_{\text{calcd-1a-3}}$ | $\delta_{\text{calcd-1a-4}}$ | $\delta_{\text{calcd-1a-5}}$ | $\delta_{\text{calcd-1a-7}}$ | $\delta_{\text{calcd-1a-9}}$ | $\delta_{\text{calcd-1a-10}}$ | $\delta_{\text{calcd-1a-11}}$ | $\delta_{\text{calcd-1a-15}}$ | $\delta_{\text{calcd-1a-16}}$ | $\delta_{\text{calcd-1a-19}}$ | $\delta_{\text{calcd-1a-20}}$ | $\delta_{\text{calcd-1a-24}}$ | $\delta_{\text{calcd-1a-29}}$ | $\delta_{\text{calcd-1a-32}}$ | $\delta_{\text{calcd-weighted}}$ | $\delta_{\text{calcd}}$ | $\Delta\delta_{\text{expt-calcd}}$ |
|---------------------------|-------------------------|------------------------------|------------------------------|------------------------------|------------------------------|------------------------------|------------------------------|------------------------------|-------------------------------|-------------------------------|-------------------------------|-------------------------------|-------------------------------|-------------------------------|-------------------------------|-------------------------------|-------------------------------|----------------------------------|-------------------------|------------------------------------|
| 2                         | 95.1                    | 103.6451                     | 103.3428                     | 103.6405                     | 104.0296                     | 103.5745                     | 103.5434                     | 103.7728                     | 104.158                       | 103.2757                      | 104.2365                      | 103.5788                      | 104.3599                      | 103.3259                      | 104.5107                      | 104.1253                      | 104.5602                      | 103.958                          | 93.6                    | 1.5                                |
| 4                         | 56.6                    | 143.176                      | 142.5934                     | 143.3169                     | 142.5346                     | 142.9238                     | 142.8791                     | 142.9232                     | 141.7771                      | 140.995                       | 142.2207                      | 137.5833                      | 141.7144                      | 142.0518                      | 142.7495                      | 141.5591                      | 141.2018                      | 141.1509                         | 54.6                    | 2.0                                |
| 5                         | 42.3                    | 149.8044                     | 152.7057                     | 149.7687                     | 152.7018                     | 149.8301                     | 149.6911                     | 152.4025                     | 152.9272                      | 151.2885                      | 152.94                        | 153.9642                      | 153.0327                      | 152.1424                      | 149.9103                      | 153.1368                      | 153.3623                      | 152.7144                         | 42.5                    | -0.2                               |
| 6                         | 88.1                    | 106.9968                     | 107.5144                     | 107.0349                     | 107.6005                     | 106.9434                     | 106.8814                     | 107.2229                     | 107.5424                      | 107.6474                      | 107.7299                      | 109.8806                      | 107.5604                      | 107.1615                      | 106.9906                      | 107.8383                      | 107.7097                      | 107.9403                         | 89.4                    | -1.3                               |
| 7                         | 135.6                   | 65.9537                      | 64.8866                      | 65.8597                      | 64.6189                      | 66.029                       | 66.0827                      | 64.4475                      | 64.8382                       | 64.1852                       | 64.69                         | 65.2626                       | 64.9549                       | 64.0123                       | 65.9205                       | 64.8294                       | 64.9443                       | 64.98212                         | 134.5                   | 1.1                                |
| 8                         | 125.5                   | 74.1449                      | 74.5209                      | 74.1476                      | 74.4838                      | 74.1325                      | 74.112                       | 74.6155                      | 74.4235                       | 76.4413                       | 74.4512                       | 73.5634                       | 74.471                        | 74.7132                       | 74.037                        | 74.3488                       | 74.1765                       | 74.31254                         | 124.7                   | 0.8                                |
| 9                         | 123.5                   | 78.67                        | 78.582                       | 78.6915                      | 78.4171                      | 78.7007                      | 78.7386                      | 78.2044                      | 78.4263                       | 78.5149                       | 78.4904                       | 78.1164                       | 78.4473                       | 78.4549                       | 78.4729                       | 78.5576                       | 78.4631                       | 78.38649                         | 120.4                   | 3.1                                |
| 10                        | 131.5                   | 69.398                       | 68.8441                      | 69.4334                      | 68.9549                      | 69.3524                      | 69.354                       | 68.8485                      | 68.9217                       | 69.4277                       | 68.9126                       | 68.8615                       | 68.8995                       | 69.0756                       | 69.386                        | 68.9523                       | 68.8863                       | 68.96181                         | 130.3                   | 1.2                                |
| 11                        | 113.4                   | 88.2036                      | 87.9724                      | 88.2788                      | 87.578                       | 88.4077                      | 88.475                       | 87.4893                      | 87.6091                       | 87.5935                       | 87.6075                       | 86.8665                       | 87.5999                       | 87.6844                       | 87.7749                       | 87.7134                       | 87.6785                       | 87.54578                         | 110.8                   | 2.6                                |
| 12                        | 152.9                   | 47.1527                      | 47.3535                      | 47.1909                      | 47.2481                      | 47.2368                      | 47.2295                      | 47.1781                      | 47.0616                       | 46.6498                       | 47.1512                       | 48.7121                       | 47.1315                       | 47.5816                       | 46.8966                       | 47.2908                       | 47.3221                       | 47.48895                         | 152.8                   | 0.1                                |
| 13                        | 99.8                    | 100.4838                     | 99.9143                      | 100.4293                     | 99.9621                      | 100.464                      | 100.438                      | 100.1416                     | 99.4652                       | 99.9298                       | 99.9988                       | 97.8844                       | 99.6516                       | 100.9143                      | 99.8767                       | 99.5085                       | 99.3287                       | 99.44526                         | 98.3                    | 1.5                                |
| 14                        | 67.1                    | 128.3856                     | 127.5542                     | 128.2216                     | 125.9184                     | 127.2715                     | 127.1194                     | 125.1117                     | 129.9627                      | 127.6312                      | 129.773                       | 129.2527                      | 128.7447                      | 128.3219                      | 126.8309                      | 129.9143                      | 128.7482                      | 128.1144                         | 68.3                    | -1.2                               |
| 15                        | 43.6                    | 151.1639                     | 151.7383                     | 151.2977                     | 153.3103                     | 151.6581                     | 151.747                      | 153.1904                     | 151.984                       | 154.919                       | 151.6002                      | 153.3641                      | 153.502                       | 152.7246                      | 152.7249                      | 151.1248                      | 151.1608                      | 152.66                           | 42.5                    | 1.1                                |
| 16                        | 212.5                   | -8.1175                      | -8.3641                      | -8.0067                      | -12.0473                     | -7.8334                      | -7.7647                      | -12.8728                     | -9.4152                       | -11.7999                      | -9.6719                       | -12.8308                      | -12.0792                      | -10.2501                      | -11.0524                      | -9.6396                       | -10.3953                      | -11.2447                         | 214.4                   | -1.9                               |
| 17                        | 44.1                    | 152.0618                     | 152.072                      | 152.0178                     | 146.6397                     | 154.6682                     | 154.695                      | 148.4279                     | 149.7662                      | 149.0842                      | 150.5661                      | 152.9728                      | 152.7884                      | 150.8376                      | 148.4702                      | 151.1013                      | 149.71                        | 151.1728                         | 44.1                    | 0                                  |
| 18                        | 24.6                    | 169.764                      | 170.4684                     | 169.6204                     | 168.753                      | 170.9662                     | 170.9477                     | 168.7677                     | 168.9337                      | 167.207                       | 169.723                       | 167.4022                      | 168.2867                      | 170.39                        | 173.841                       | 175.8377                      | 176.2198                      | 170.1943                         | 24.1                    | 0.6                                |
| 19                        | 32.7                    | 162.5495                     | 163.5064                     | 162.5979                     | 162.4659                     | 165.2158                     | 165.2457                     | 161.7975                     | 162.177                       | 163.3183                      | 162.6483                      | 165.9218                      | 165.6283                      | 165.3981                      | 161.0469                      | 162.7448                      | 162.0306                      | 163.8336                         | 30.8                    | 1.9                                |
| 20                        | 23.7                    | 169.329                      | 171.3639                     | 169.2514                     | 169.3683                     | 171.4043                     | 171.3781                     | 169.6848                     | 169.4976                      | 170.23                        | 169.3865                      | 174.026                       | 173.897                       | 171.636                       | 172.4786                      | 173.9695                      | 174.9775                      | 172.5807                         | 21.6                    | 2.1                                |
| 21                        | 14.4                    | 178.7505                     | 178.6348                     | 178.8018                     | 178.625                      | 178.6277                     | 178.6308                     | 178.3862                     | 178.6252                      | 178.4482                      | 178.6649                      | 178.5056                      | 178.3785                      | 177.8857                      | 177.9244                      | 181.4952                      | 179.6468                      | 178.7196                         | 15.2                    | -0.8                               |
| <b>OCH<sub>3</sub>-13</b> | 56.2                    | 139.7379                     | 139.7982                     | 139.6854                     | 139.5896                     | 139.1504                     | 139.1997                     | 139.3135                     | 140.0451                      | 139.5849                      | 139.8227                      | 141.154                       | 139.9798                      | 139.3754                      | 139.6931                      | 140.1802                      | 140.1355                      | 140.042                          | 55.8                    | 0.4                                |

**Table S6** Experimental and calculated  $^{13}\text{C}$  NMR of **1b**

| No. | $\delta_{\text{expt.}}$ | $\delta_{\text{calcd-1b-1}}$ | $\delta_{\text{calcd-1b-2}}$ | $\delta_{\text{calcd-1b-3}}$ | $\delta_{\text{calcd-1b-13}}$ | $\delta_{\text{calcd-1b-15}}$ | $\delta_{\text{calcd-1b-18}}$ | $\delta_{\text{calcd-1a-20}}$ | $\delta_{\text{calcd-1b-28}}$ | $\delta_{\text{calcd-1b-45}}$ | $\delta_{\text{calcd-1b-47}}$ | $\delta_{\text{calcd-weighted}}$ | $\delta_{\text{calcd}}$ | $\Delta\delta_{\text{expt-calcd}}$ |
|-----|-------------------------|------------------------------|------------------------------|------------------------------|-------------------------------|-------------------------------|-------------------------------|-------------------------------|-------------------------------|-------------------------------|-------------------------------|----------------------------------|-------------------------|------------------------------------|
| 2   | 95.1                    | 96.5596                      | 97.2456                      | 97.3698                      | 97.2528                       | 97.5001                       | 96.7698                       | 96.9898                       | 97.3424                       | 96.7478                       | 96.9434                       | 97.26971                         | 100.6                   | -5.5                               |
| 4   | 56.6                    | 134.0472                     | 134.428                      | 134.1978                     | 134.1905                      | 134.17                        | 131.4149                      | 133.9853                      | 134.2091                      | 134.1056                      | 133.9093                      | 134.1318                         | 62.0                    | -5.4                               |
| 5   | 42.3                    | 163.1208                     | 163.1566                     | 162.8913                     | 162.9075                      | 163.0393                      | 163.3667                      | 163.0067                      | 163.1666                      | 163.0351                      | 162.9908                      | 163.0886                         | 31.6                    | 10.7                               |

|                      |       |          |          |          |          |          |          |          |          |          |          |          |       |      |
|----------------------|-------|----------|----------|----------|----------|----------|----------|----------|----------|----------|----------|----------|-------|------|
| 6                    | 88.1  | 104.4844 | 104.6163 | 104.4335 | 104.4043 | 104.5832 | 104.864  | 104.5446 | 104.7088 | 104.553  | 104.5996 | 104.5938 | 92.9  | -4.8 |
| 7                    | 135.6 | 59.6605  | 59.9326  | 59.9654  | 60.0061  | 60.1094  | 59.084   | 59.8479  | 59.9674  | 60.0019  | 59.8084  | 59.95003 | 139.7 | -4.1 |
| 8                    | 125.5 | 74.5909  | 74.5486  | 74.6776  | 74.7187  | 74.7369  | 75.2436  | 74.7318  | 74.6051  | 74.6419  | 74.7261  | 74.67434 | 124.3 | 1.2  |
| 9                    | 123.5 | 75.8426  | 76.1767  | 76.3564  | 76.2424  | 76.2873  | 75.5795  | 76.1293  | 76.0393  | 76.0082  | 76.1021  | 76.17867 | 122.7 | 0.8  |
| 10                   | 131.5 | 69.5397  | 69.5131  | 69.5036  | 69.4965  | 69.3551  | 69.5604  | 69.4846  | 69.4871  | 69.4631  | 69.4839  | 69.45472 | 129.8 | 1.7  |
| 11                   | 113.4 | 78.6046  | 79.3181  | 79.3797  | 79.1309  | 79.4156  | 77.8375  | 79.0115  | 79.0892  | 79.0145  | 78.9571  | 79.22735 | 119.5 | -6.1 |
| 12                   | 152.9 | 43.604   | 43.8985  | 43.9019  | 43.8279  | 43.9449  | 42.5465  | 43.813   | 43.9431  | 43.6631  | 43.812   | 43.8366  | 156.6 | -3.7 |
| 13                   | 99.8  | 99.7426  | 100.4986 | 99.5273  | 99.2305  | 99.9458  | 100.0271 | 100.1169 | 100.8443 | 99.9089  | 100.1599 | 100.1452 | 97.6  | 2.2  |
| 14                   | 67.1  | 120.9839 | 123.3105 | 123.4237 | 123.2959 | 123.5907 | 123.332  | 122.788  | 123.3228 | 121.9435 | 122.776  | 123.2733 | 73.3  | -6.2 |
| 15                   | 43.6  | 148.1745 | 148.6294 | 150.6511 | 150.5795 | 146.7494 | 145.3157 | 147.2509 | 147.1286 | 148.1997 | 147.2788 | 147.8021 | 47.6  | -4.0 |
| 16                   | 212.5 | -10.1986 | -10.8879 | -11.4322 | -11.4513 | -9.4135  | -10.7309 | -9.8494  | -11.0808 | -9.9334  | -9.8182  | -10.2763 | 213.4 | -0.9 |
| 17                   | 44.1  | 151.4523 | 151.2356 | 150.6164 | 150.3814 | 152.7078 | 151.7406 | 152.0104 | 154.1594 | 149.9725 | 152.0601 | 151.8354 | 43.4  | 0.7  |
| 18                   | 24.6  | 170.035  | 166.4613 | 166.2938 | 166.1028 | 175.1834 | 170.8958 | 173.2529 | 174.6989 | 171.6677 | 173.2617 | 170.686  | 23.6  | 1.0  |
| 19                   | 32.7  | 163.9333 | 163.5638 | 163.8814 | 164.2485 | 162.254  | 161.3645 | 161.1682 | 162.522  | 164.2385 | 161.1516 | 162.853  | 31.8  | 0.9  |
| 20                   | 23.7  | 171.3084 | 169.4266 | 169.2849 | 169.2314 | 174.9903 | 168.3369 | 170.7013 | 174.9825 | 171.1202 | 170.6584 | 171.6697 | 22.6  | 1.1  |
| 21                   | 14.4  | 178.6388 | 178.9477 | 178.5898 | 178.5112 | 181.1391 | 178.3097 | 178.4924 | 180.4298 | 180.4931 | 178.5197 | 179.6972 | 14.2  | 0.2  |
| OCH <sub>3</sub> -13 | 56.2  | 141.0284 | 141.1564 | 141.2915 | 141.2721 | 140.6017 | 140.7886 | 141.2363 | 140.3453 | 141.1986 | 141.2044 | 140.9367 | 54.8  | 1.4  |

**Table S7** Experimental and calculated  $^{13}\text{C}$  NMR of **1c**

| No. | $\delta_{\text{expt.}}$ | $\delta_{\text{calcd-1c-1}}$ | $\delta_{\text{calcd-1c-2}}$ | $\delta_{\text{calcd-1c-3}}$ | $\delta_{\text{calcd-1c-4}}$ | $\delta_{\text{calcd-1b-15}}$ | $\delta_{\text{calcd-1c-5}}$ | $\delta_{\text{calcd-1c-6}}$ | $\delta_{\text{calcd-1c-7}}$ | $\delta_{\text{calcd-1c-9}}$ | $\delta_{\text{calcd-1c-10}}$ | $\delta_{\text{calcd-1c-12}}$ | $\delta_{\text{calcd-1c-16}}$ | $\delta_{\text{calcd-1c-18}}$ | $\delta_{\text{calcd-1c-19}}$ | $\delta_{\text{calcd-1c-20}}$ | $\delta_{\text{calcd-weighted}}$ | $\delta_{\text{calcd}}$ | $\Delta\delta_{\text{expt-calcd}}$ |
|-----|-------------------------|------------------------------|------------------------------|------------------------------|------------------------------|-------------------------------|------------------------------|------------------------------|------------------------------|------------------------------|-------------------------------|-------------------------------|-------------------------------|-------------------------------|-------------------------------|-------------------------------|----------------------------------|-------------------------|------------------------------------|
| 2   | 95.1                    | 94.8994                      | 94.9239                      | 94.8493                      | 94.726                       | 95.083                        | 94.7618                      | 94.7722                      | 94.9291                      | 94.9358                      | 95.2504                       | 95.1817                       | 95.3179                       | 95.2211                       | 95.2008                       | 95.2826                       | 95.14946                         | 102.8                   | -7.7                               |
| 4   | 56.6                    | 139.500<br>6                 | 139.443<br>6                 | 139.549<br>6                 | 139.444<br>7                 | 139.473<br>7                  | 139.378<br>4                 | 139.540<br>6                 | 139.444<br>3                 | 139.457<br>6                 | 139.464<br>7                  | 139.550<br>2                  | 139.551<br>3                  | 139.770<br>5                  | 139.578<br>8                  | 139.790<br>7                  | 139.5826                         | 56.2                    | 0.4                                |
| 5   | 42.3                    | 160.845<br>4                 | 160.850<br>6                 | 160.808<br>3                 | 160.678<br>8                 | 160.702<br>2                  | 160.740<br>6                 | 161.011<br>2                 | 161.031<br>5                 | 160.904<br>9                 | 160.894<br>2                  | 160.892<br>4                  | 160.697<br>6                  | 160.947<br>5                  | 160.947<br>4                  | 160.983<br>8                  | 160.8735                         | 33.9                    | 8.4                                |
| 6   | 88.1                    | 110.224<br>8                 | 110.080<br>8                 | 110.132                      | 110.143<br>9                 | 110.291<br>1                  | 110.195<br>8                 | 110.085<br>2                 | 110.108<br>9                 | 110.143<br>6                 | 110.207<br>6                  | 110.398<br>8                  | 109.673<br>1                  | 110.344<br>4                  | 110.388                       | 110.421<br>9                  | 110.1875                         | 87.1                    | 1.0                                |
| 7   | 135.6                   | 56.6148                      | 56.678                       | 56.6507                      | 56.6366                      | 56.6171                       | 56.6637                      | 56.6335                      | 56.709                       | 56.7056                      | 56.7692                       | 56.6729                       | 56.8859                       | 56.5815                       | 56.6334                       | 56.5698                       | 56.68445                         | 143.2                   | -7.6                               |
| 8   | 125.5                   | 74.3677                      | 74.3881                      | 74.3134                      | 74.466                       | 74.2274                       | 74.2879                      | 74.247                       | 74.2126                      | 74.3639                      | 74.215                        | 74.2791                       | 74.215                        | 74.4838                       | 74.4217                       | 74.4162                       | 74.3312                          | 124.7                   | 0.8                                |
| 9   | 123.5                   | 75.3772                      | 75.354                       | 75.4388                      | 75.3767                      | 75.3874                       | 75.3282                      | 75.3879                      | 75.3236                      | 75.4372                      | 75.4346                       | 75.3946                       | 75.3518                       | 75.3666                       | 75.3964                       | 75.3358                       | 75.38054                         | 123.6                   | -0.1                               |
| 10  | 131.5                   | 70.8121                      | 70.7047                      | 70.7704                      | 70.6717                      | 70.8353                       | 70.6862                      | 70.7253                      | 70.6922                      | 70.674                       | 70.7644                       | 70.8491                       | 70.6857                       | 70.8506                       | 70.8072                       | 70.8595                       | 70.77884                         | 128.4                   | 3.1                                |
| 11  | 113.4                   | 76.521                       | 76.6102                      | 76.5128                      | 76.5074                      | 76.3705                       | 76.5617                      | 76.6428                      | 76.7925                      | 76.5907                      | 76.5055                       | 76.3742                       | 76.5509                       | 76.1129                       | 76.3247                       | 76.0767                       | 76.39377                         | 122.5                   | -9.1                               |
| 12  | 152.9                   | 47.672                       | 47.6658                      | 47.7183                      | 47.7422                      | 47.6408                       | 47.7756                      | 47.7788                      | 47.5675                      | 47.6484                      | 47.3734                       | 47.4475                       | 47.2966                       | 47.3173                       | 47.3568                       | 47.3552                       | 47.4429                          | 152.9                   | 0.0                                |
| 13  | 99.8                    | 101.285<br>5                 | 101.240<br>4                 | 101.295<br>7                 | 101.098<br>7                 | 101.549<br>5                  | 100.842<br>5                 | 101.244<br>8                 | 101.222                      | 101.288                      | 101.044<br>7                  | 101.4                         | 100.51                        | 101.045<br>7                  | 101.500<br>5                  | 101.034<br>2                  | 101.0913                         | 96.6                    | 3.2                                |
| 14  | 67.1                    | 128.855                      | 128.771<br>1                 | 128.803                      | 128.599<br>2                 | 129.640<br>1                  | 128.092<br>6                 | 128.844<br>7                 | 128.996                      | 128.945<br>3                 | 129.866<br>6                  | 130.254<br>4                  | 129.771<br>6                  | 130.794<br>6                  | 130.538<br>8                  | 130.768<br>2                  | 129.9008                         | 66.4                    | 0.7                                |
| 15  | 43.6                    | 154.790<br>3                 | 154.746                      | 154.134<br>1                 | 154.646<br>2                 | 154.246<br>7                  | 154.730<br>2                 | 154.677<br>6                 | 154.174<br>4                 | 154.245<br>6                 | 149.148<br>1                  | 152.396<br>3                  | 156.138<br>8                  | 153.173<br>4                  | 153.930<br>7                  | 153.051<br>9                  | 153.4251                         | 41.7                    | 1.9                                |



|                           |       |          |          |          |          |          |          |          |          |          |          |          |          |          |          |          |          |       |      |
|---------------------------|-------|----------|----------|----------|----------|----------|----------|----------|----------|----------|----------|----------|----------|----------|----------|----------|----------|-------|------|
| <b>16</b>                 | 212.5 | -9.8817  | -9.8669  | -9.9648  | -10.3105 | -10.9876 | -10.5416 | -10.037  | -9.7718  | -10.0003 | -13.5499 | -9.9789  | -11.2685 | -8.7111  | -9.0903  | -8.7681  | -10.2978 | 213.4 | -0.9 |
| <b>17</b>                 | 44.1  | 150.1718 | 150.1282 | 151.3809 | 151.5539 | 149.9405 | 151.2867 | 150.0429 | 151.5553 | 150.9139 | 153.2881 | 153.0041 | 150.8224 | 152.2687 | 156.5978 | 152.2071 | 152.2447 | 43.0  | 1.1  |
| <b>18</b>                 | 24.6  | 168.9487 | 168.9123 | 169.9063 | 170.2723 | 163.5926 | 170.1934 | 171.3575 | 173.6339 | 172.3461 | 164.2293 | 169.2315 | 169.7085 | 172.4052 | 171.7067 | 172.3226 | 169.8238 | 24.5  | 0.1  |
| <b>19</b>                 | 32.7  | 162.4268 | 162.4863 | 162.6788 | 163.8205 | 160.6224 | 163.8911 | 164.3444 | 161.5275 | 164.6058 | 163.5144 | 162.4651 | 165.6442 | 161.0049 | 167.2673 | 160.9891 | 163.2625 | 31.4  | 1.3  |
| <b>20</b>                 | 23.7  | 169.4406 | 169.4283 | 169.4161 | 171.6554 | 169.6634 | 171.7286 | 171.2542 | 170.7566 | 171.0348 | 169.5171 | 169.7489 | 171.6716 | 169.2893 | 173.3725 | 169.3197 | 170.3736 | 24.0  | -0.3 |
| <b>21</b>                 | 14.4  | 178.7273 | 178.7649 | 178.7261 | 178.7311 | 178.8994 | 178.7567 | 180.8538 | 178.5461 | 180.8283 | 179.1931 | 178.8252 | 181.3962 | 178.6762 | 178.6787 | 178.3131 | 179.2497 | 14.6  | -0.2 |
| <b>OCH<sub>3</sub>-13</b> | 56.2  | 135.9939 | 136.0071 | 136.0141 | 135.9367 | 135.1721 | 135.9117 | 135.9002 | 136.0839 | 136.0346 | 135.6292 | 134.7275 | 135.5911 | 134.3308 | 135.0551 | 134.3124 | 135.2506 | 60.8  | -4.6 |

**Table S8** Experimental and calculated <sup>13</sup>C NMR of **1d**

| No.      | $\delta_{\text{expt.}}$ | $\delta_{\text{calcd-1d-1}}$ | $\delta_{\text{calcd-1d-3}}$ | $\delta_{\text{calcd-1d-4}}$ | $\delta_{\text{calcd-1d-5}}$ | $\delta_{\text{calcd-1d-6}}$ | $\delta_{\text{calcd-1d-7}}$ | $\delta_{\text{calcd-1d-10}}$ | $\delta_{\text{calcd-1d-11}}$ | $\delta_{\text{calcd-1d-12}}$ | $\delta_{\text{calcd-1d-16}}$ | $\delta_{\text{calcd-1d-19}}$ | $\delta_{\text{calcd-1d-23}}$ | $\delta_{\text{calcd-weighted}}$ | $\delta_{\text{calcd}}$ | $\Delta\delta_{\text{expt-calcd}}$ |
|----------|-------------------------|------------------------------|------------------------------|------------------------------|------------------------------|------------------------------|------------------------------|-------------------------------|-------------------------------|-------------------------------|-------------------------------|-------------------------------|-------------------------------|----------------------------------|-------------------------|------------------------------------|
| <b>2</b> | 95.1                    | 100.914                      | 101.1236                     | 100.9651                     | 100.6559                     | 100.4888                     | 101.1253                     | 100.8296                      | 100.9175                      | 101.2924                      | 100.8862                      | 101.0346                      | 99.4829                       | 100.8743                         | 96.8                    | -1.7                               |
| <b>4</b> | 56.6                    | 148.1289                     | 148.2173                     | 148.2618                     | 147.977                      | 148.0189                     | 148.4031                     | 148.1384                      | 148.2058                      | 148.3442                      | 148.1021                      | 148.3447                      | 149.5884                      | 148.2515                         | 47.1                    | 9.5                                |
| <b>5</b> | 42.3                    | 152.6669                     | 149.6294                     | 152.5997                     | 152.655                      | 152.6695                     | 152.6481                     | 152.7122                      | 152.74                        | 152.7222                      | 152.6897                      | 152.8578                      | 150.5943                      | 152.5725                         | 42.6                    | -0.3                               |
| <b>6</b> | 88.1                    | 108.097                      | 107.702                      | 108.045                      | 108.2286                     | 108.1362                     | 108.018                      | 108.2114                      | 108.2253                      | 107.9775                      | 108.0946                      | 108.1521                      | 108.6686                      | 108.1096                         | 89.2                    | -1.1                               |
| <b>7</b> | 135.6                   | 61.8811                      | 63.2634                      | 61.7483                      | 61.8321                      | 62.0265                      | 62.0153                      | 61.7118                       | 62.0141                       | 62.0809                       | 62.0617                       | 61.8575                       | 61.7761                       | 61.96405                         | 137.6                   | -2.0                               |
| <b>8</b> | 125.5                   | 75.1542                      | 74.4567                      | 75.0479                      | 74.9863                      | 74.9992                      | 75.0807                      | 75.0254                       | 75.0255                       | 75.0504                       | 75.013                        | 75.0666                       | 76.8245                       | 75.1016                          | 123.9                   | 1.6                                |

|                |       |          |          |          |          |          |          |          |          |          |          |          |          |          |       |      |
|----------------|-------|----------|----------|----------|----------|----------|----------|----------|----------|----------|----------|----------|----------|----------|-------|------|
| <b>9</b>       | 123.5 | 79.5443  | 79.7103  | 79.4654  | 79.5424  | 79.6085  | 79.5127  | 79.5002  | 79.6164  | 79.6254  | 79.653   | 79.4325  | 79.0076  | 79.52775 | 119.2 | 4.3  |
| <b>10</b>      | 131.5 | 70.2306  | 70.5806  | 70.1947  | 70.0745  | 70.13    | 70.1644  | 70.1932  | 70.1447  | 70.207   | 70.2426  | 70.11    | 70.8895  | 70.19305 | 129.0 | 2.5  |
| <b>11</b>      | 113.4 | 83.455   | 83.9685  | 83.6172  | 83.8498  | 83.7532  | 83.5072  | 83.5414  | 83.7807  | 83.511   | 83.6835  | 83.516   | 82.6252  | 83.56203 | 115.0 | -1.6 |
| <b>12</b>      | 152.9 | 50.3548  | 50.6418  | 50.4089  | 50.6527  | 50.6405  | 50.4729  | 50.408   | 50.632   | 50.5442  | 50.6222  | 50.4033  | 50.9339  | 50.52169 | 149.6 | 3.3  |
| <b>13</b>      | 99.8  | 103.8421 | 103.3128 | 103.9607 | 104.0037 | 104.1339 | 103.8205 | 104.0207 | 103.9828 | 103.698  | 104.0314 | 103.5248 | 103.5231 | 103.855  | 93.7  | 6.1  |
| <b>14</b>      | 67.1  | 132.0671 | 131.712  | 131.7338 | 131.7926 | 131.4699 | 132.008  | 132.0516 | 131.6668 | 132.1433 | 131.9393 | 131.8779 | 130.006  | 131.8105 | 64.4  | 2.7  |
| <b>15</b>      | 43.6  | 153.3977 | 155.3819 | 153.5515 | 152.7244 | 153.5138 | 153.0891 | 153.6226 | 152.4872 | 153.5163 | 153.5792 | 152.3889 | 152.8257 | 153.1421 | 42.0  | 1.6  |
| <b>16</b>      | 212.5 | -10.266  | -11.9001 | -12.5046 | -11.5347 | -10.1837 | -10.0994 | -10.0455 | -10.0437 | -10.51   | -9.9254  | -10.4542 | -9.2212  | -10.2553 | 213.4 | -0.9 |
| <b>17</b>      | 44.1  | 151.5502 | 150.5238 | 150.0038 | 150.4287 | 150.3746 | 152.8448 | 151.3455 | 152.2577 | 151.3184 | 151.3597 | 152.9318 | 158.2518 | 152.0221 | 43.2  | 0.9  |
| <b>18</b>      | 24.6  | 168.8304 | 166.291  | 164.0375 | 163.3405 | 168.8844 | 169.7837 | 171.4664 | 172.6419 | 171.3479 | 168.7653 | 172.4834 | 169.48   | 169.7211 | 24.6  | 0.0  |
| <b>19</b>      | 32.7  | 162.2997 | 163.6831 | 160.5768 | 160.6451 | 162.3942 | 162.664  | 164.3628 | 161.5732 | 164.3867 | 162.491  | 164.6691 | 165.5603 | 162.8118 | 31.9  | 0.8  |
| <b>20</b>      | 23.7  | 169.6189 | 169.3985 | 169.524  | 169.5847 | 169.5347 | 169.3935 | 171.1669 | 170.2762 | 171.1612 | 169.3116 | 171.2474 | 172.1389 | 169.9758 | 24.4  | -0.7 |
| <b>21</b>      | 14.4  | 178.7553 | 179.0143 | 178.8452 | 178.8678 | 178.8373 | 178.7547 | 180.7528 | 178.5401 | 180.8546 | 178.7932 | 180.9289 | 178.2295 | 179.1548 | 14.7  | -0.3 |
| <b>OCH3-13</b> | 56.2  | 135.3489 | 133.3458 | 135.4552 | 133.6718 | 135.3239 | 135.3889 | 135.3564 | 135.2612 | 135.3787 | 135.3336 | 134.9568 | 137.7642 | 135.2769 | 60.8  | -4.6 |

**Table S9.** Related parameters of  $^{13}\text{C}$  NMR calculations and DP4<sup>+</sup> analysis for four potential isomers of **1**

| Configuration | DP4+(%) | $R^2$  | RMSE |
|---------------|---------|--------|------|
| <b>1a</b>     | 100     | 0.9994 | 1.50 |
| <b>1b</b>     | 0.00    | 0.9944 | 4.10 |
| <b>1c</b>     | 0.00    | 0.9945 | 4.00 |
| <b>1d</b>     | 0.00    | 0.9964 | 3.23 |

### 1.3 ECD calculation

The theoretical calculations were carried out using Gaussian 09.<sup>2</sup> Firstly, conformers were optimized using density functional theory method and at B3LYP/6-31G (d) and filtered by Boltzmann-based population. The remaining conformers were finally calculated to obtain the ECD spectrum. The ECD calculation was conducted using Time-dependent Density functional theory (TD-DFT) at CAM-B3LYP/6-31G (d) level. Rotatory strengths for a total of 70 excited states were calculated. The ECD spectrum was simulated in SpecDis1.70 by overlapping Gaussian functions for each transition according to the following equation.<sup>5</sup>

$$\Delta\varepsilon(E) = \frac{1}{2.297 \times 10^{-39}} \times \frac{1}{\sqrt{2\pi\sigma}} \sum_i^A \Delta E_i R_i e^{-\left(\frac{E-E_i}{2\sigma}\right)^2}$$

where  $\sigma$  represents the width of the band at  $1/e$  height, and  $\Delta E_i$  and  $R_i$  are the excitation energies and rotatory strengths for transition  $i$ , respectively.

**Table S10** Anti-inflammatory activity of compounds **1-5** on NO production in LPS-induced RAW264.7 mouse macrophages and the cell survival rates.

| Compounds                   | Inhibition (%)                      | Survival rates (%) of RAW 264.7 at 200 $\mu\text{M}$ |                           |
|-----------------------------|-------------------------------------|------------------------------------------------------|---------------------------|
|                             |                                     | LPS (0 $\mu\text{g/mL}$ )                            | LPS (1 $\mu\text{g/mL}$ ) |
| <b>1</b>                    | 41.29 $\pm$ 2.80                    | 97.36 $\pm$ 4.13                                     | 97.68 $\pm$ 3.97          |
| <b>2</b>                    | 17.73 $\pm$ 2.80                    | 94.85 $\pm$ 3.87                                     | 95.12 $\pm$ 4.75          |
| <b>3</b>                    | 10.91 $\pm$ 2.26                    | 93.77 $\pm$ 3.94                                     | 95.12 $\pm$ 4.58          |
| <b>4</b>                    | 5.16 $\pm$ 1.66                     | 98.12 $\pm$ 4.81                                     | 96.73 $\pm$ 3.79          |
| <b>5</b>                    | 13.96 $\pm$ 1.71                    | 97.86 $\pm$ 3.45                                     | 96.24 $\pm$ 4.35          |
| <i>L</i> -NMMA <sup>b</sup> | IC <sub>50</sub> = 33.74 $\pm$ 2.13 | 92.43 $\pm$ 3.53                                     | 94.48 $\pm$ 2.47          |

<sup>b</sup> NG-Monomethyl-*L*-arginine (*L*-NMMA) was used as a positive control.



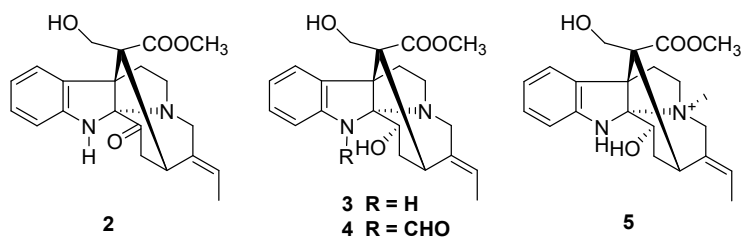

**Figure S1** The isolated known PiNPs from *Alstonia scholaris*

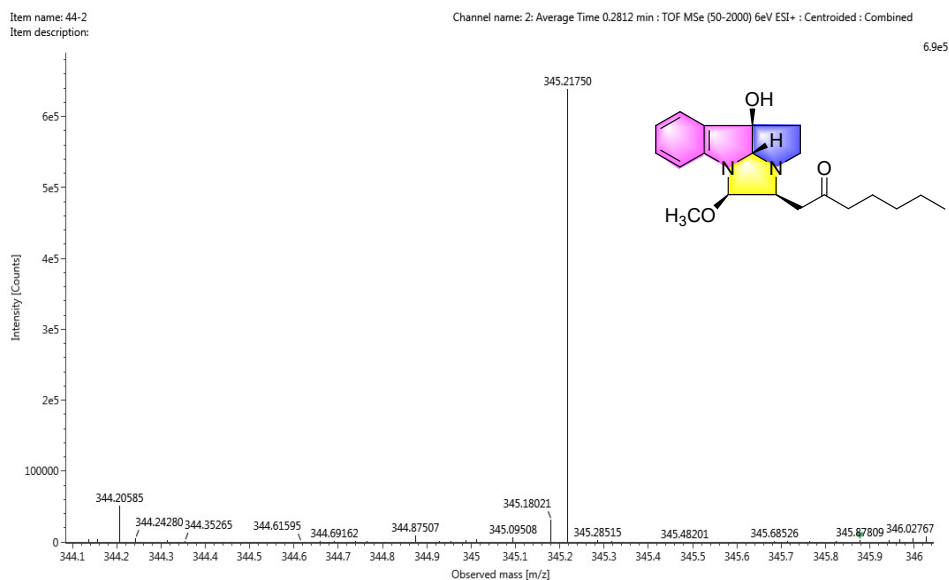

**Figure S2.** (+)-HR-ESI-MS spectrum of **1**

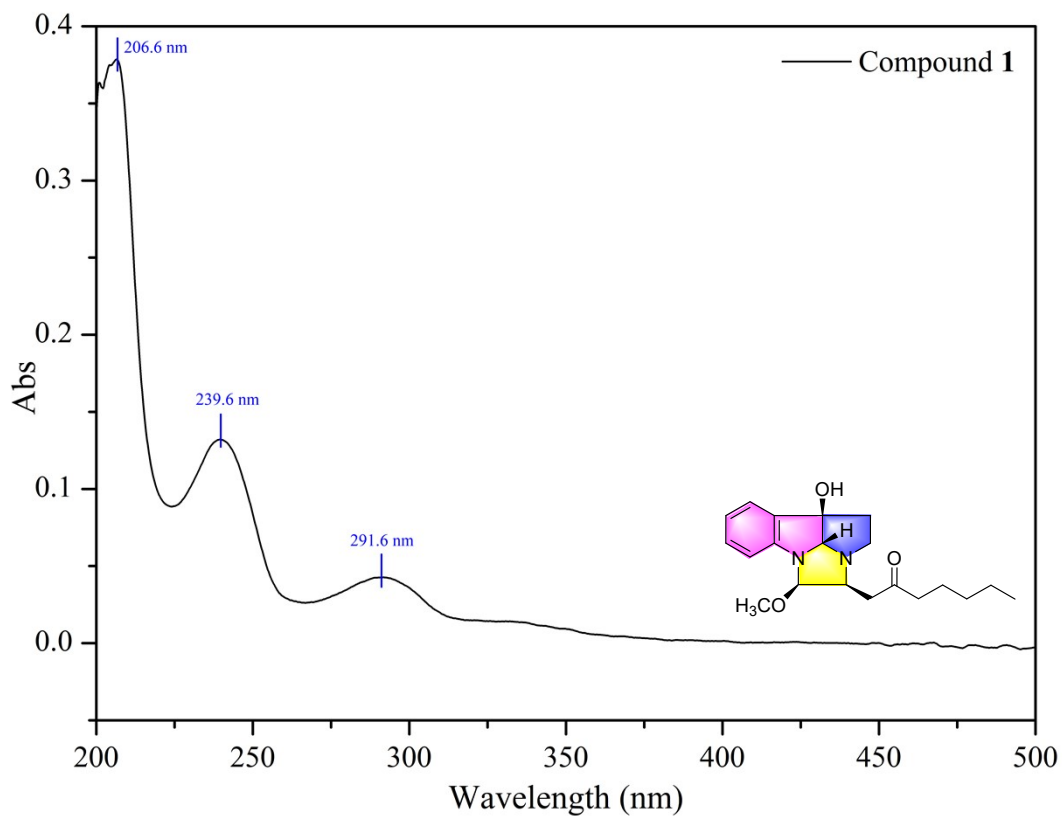

**Figure S3.** UV spectrum of **1** in MeOH

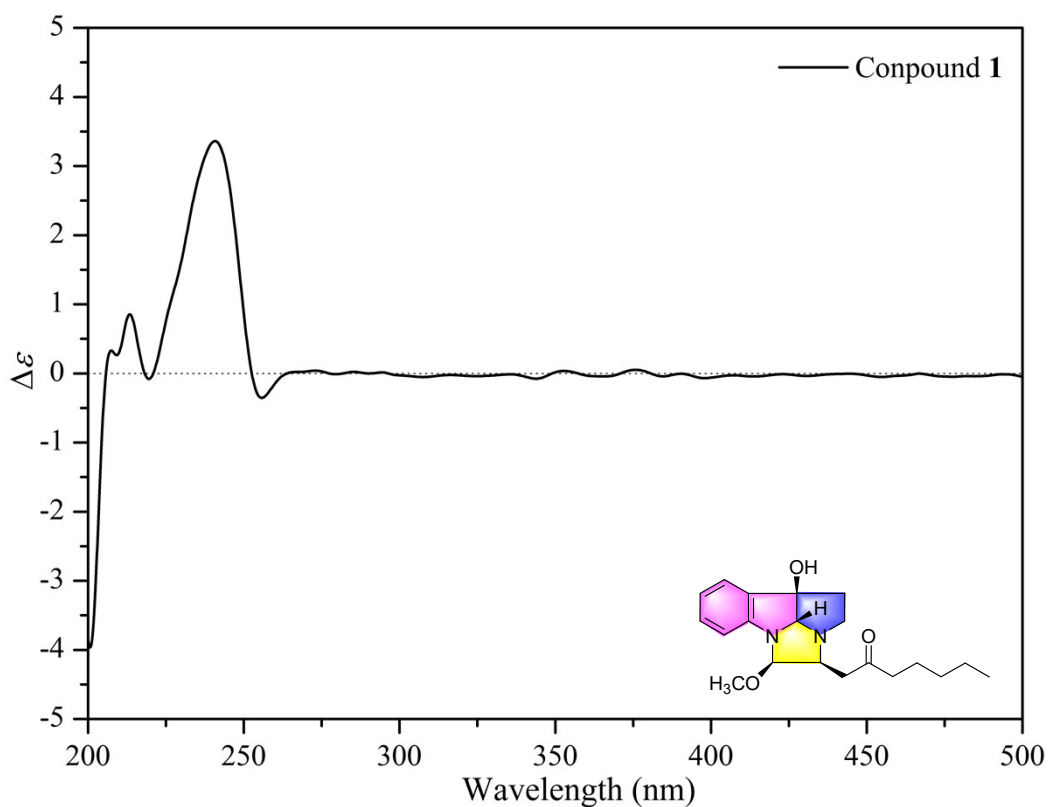

Figure S4. ECD spectrum of 1 in MeOH

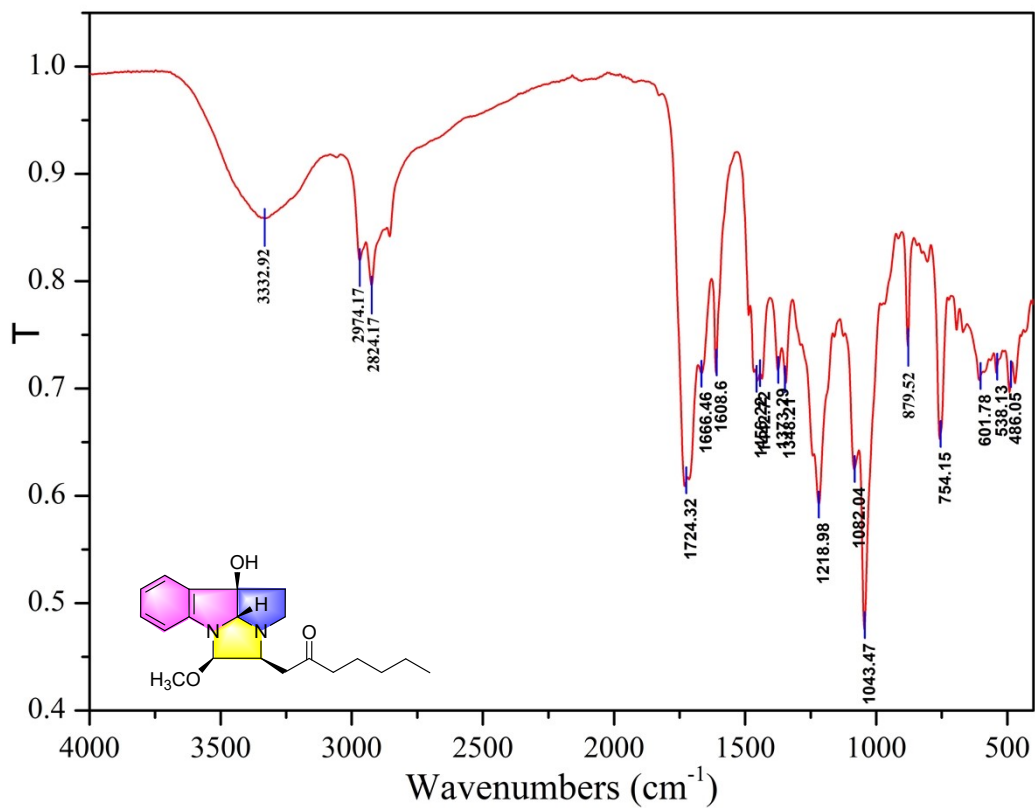

Figure S5. IR spectrum of 1

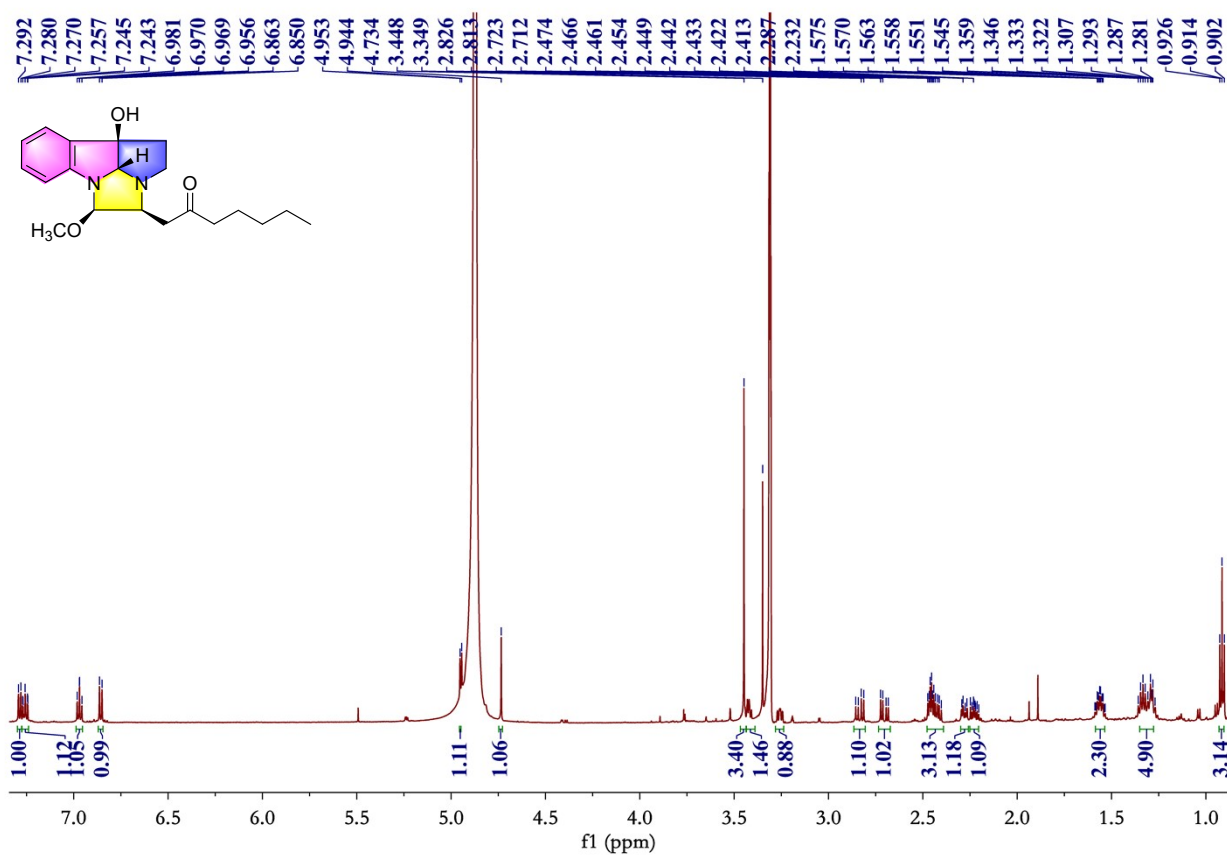

Figure S6. <sup>1</sup>H NMR (600 MHz) spectrum of 1 in CD<sub>3</sub>OD

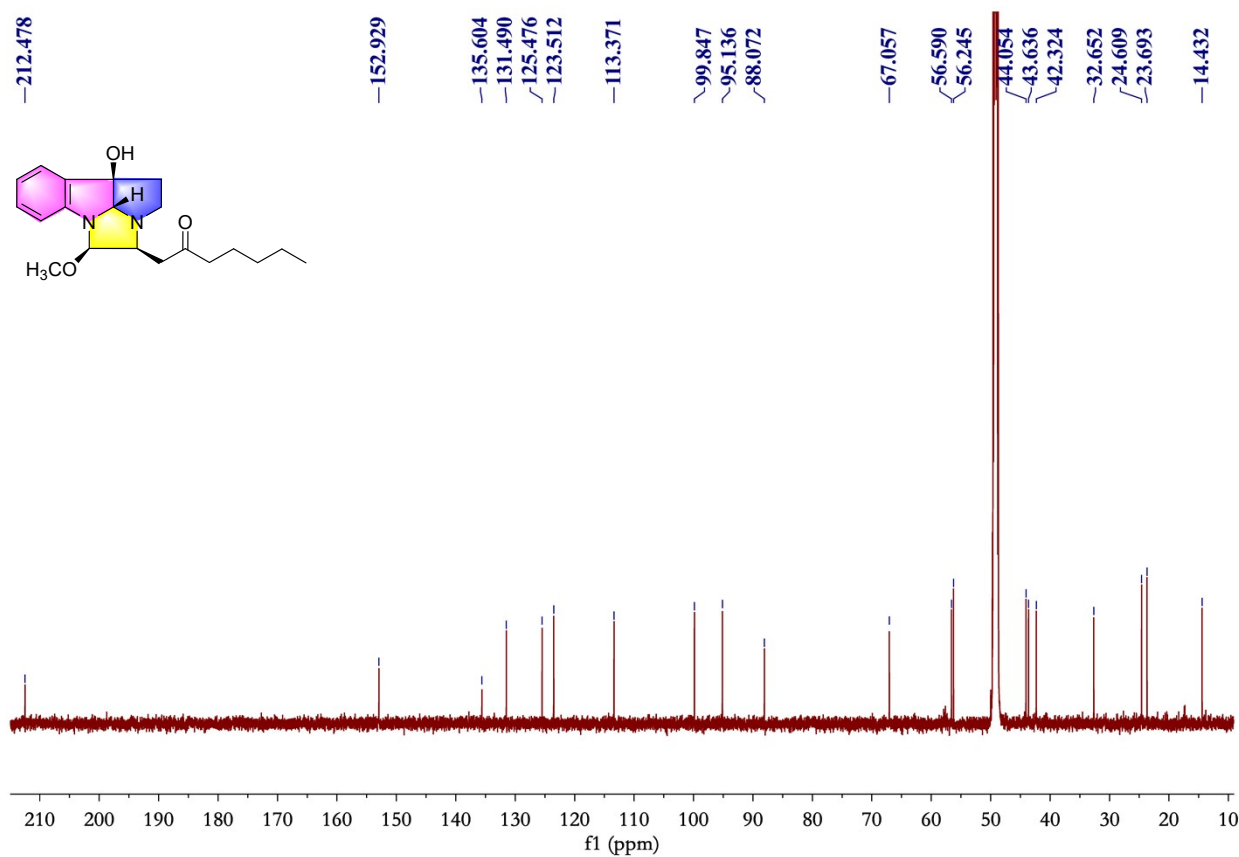

Figure S7. <sup>13</sup>C NMR (150 MHz) spectrum of 1 in CD<sub>3</sub>OD

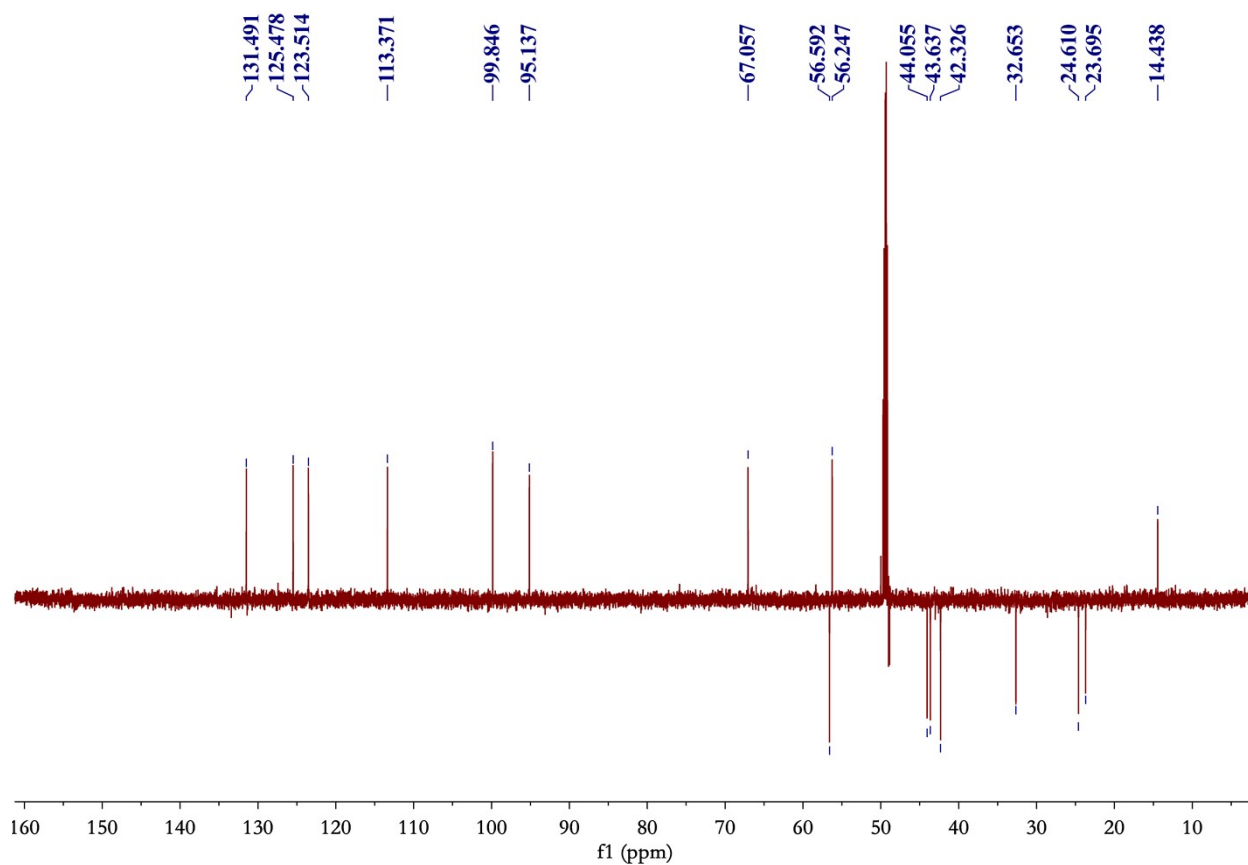

**Figure S8.** DEPT 135 spectrum of **1** in CD<sub>3</sub>OD

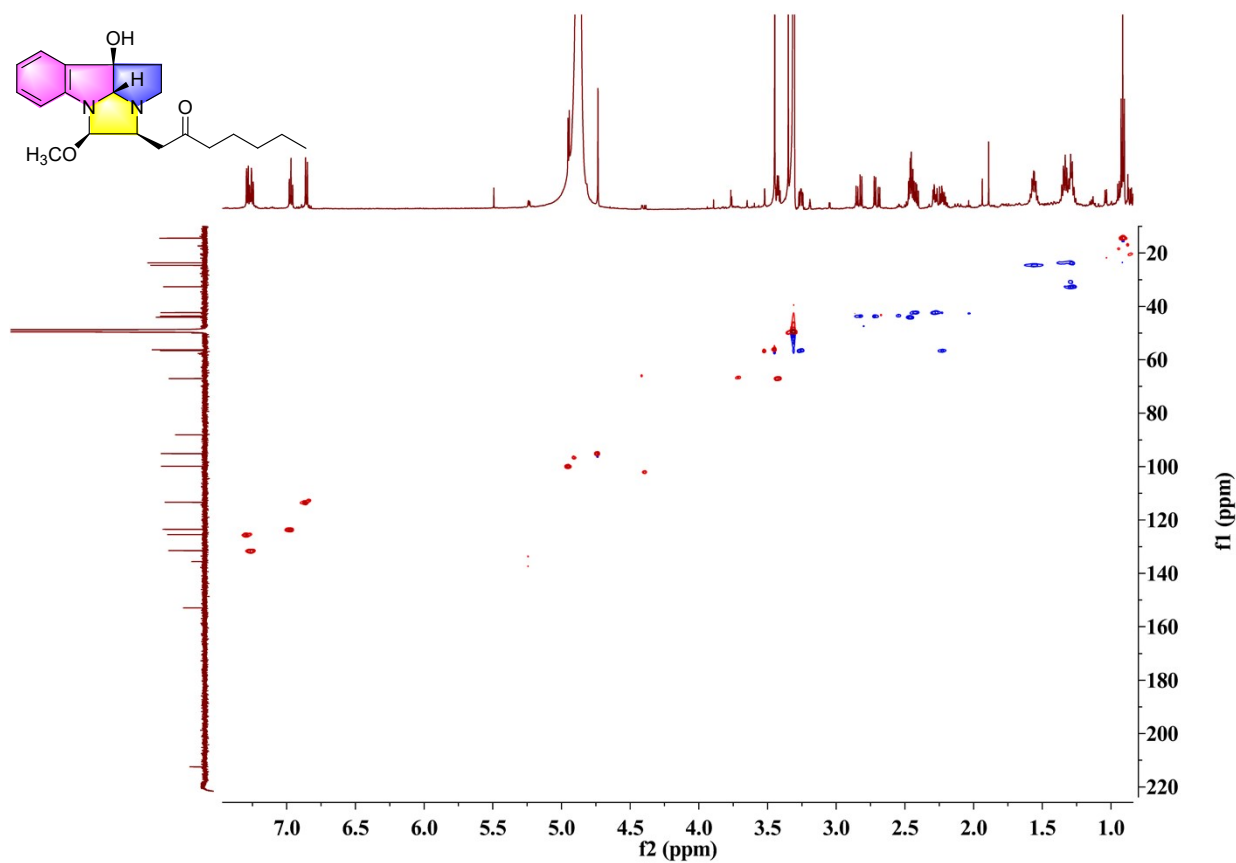

**Figure S9.** HSQC spectrum of **1** in CD<sub>3</sub>OD



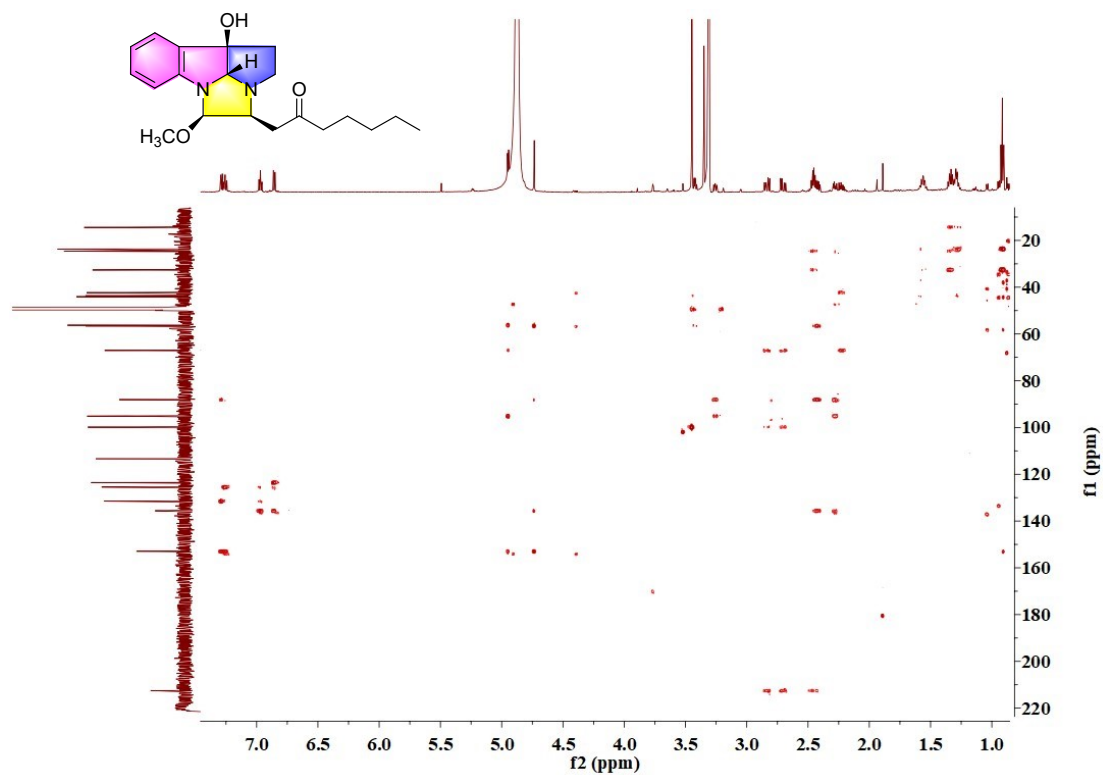

Figure S10. HMBC spectrum of **1** in CD<sub>3</sub>OD

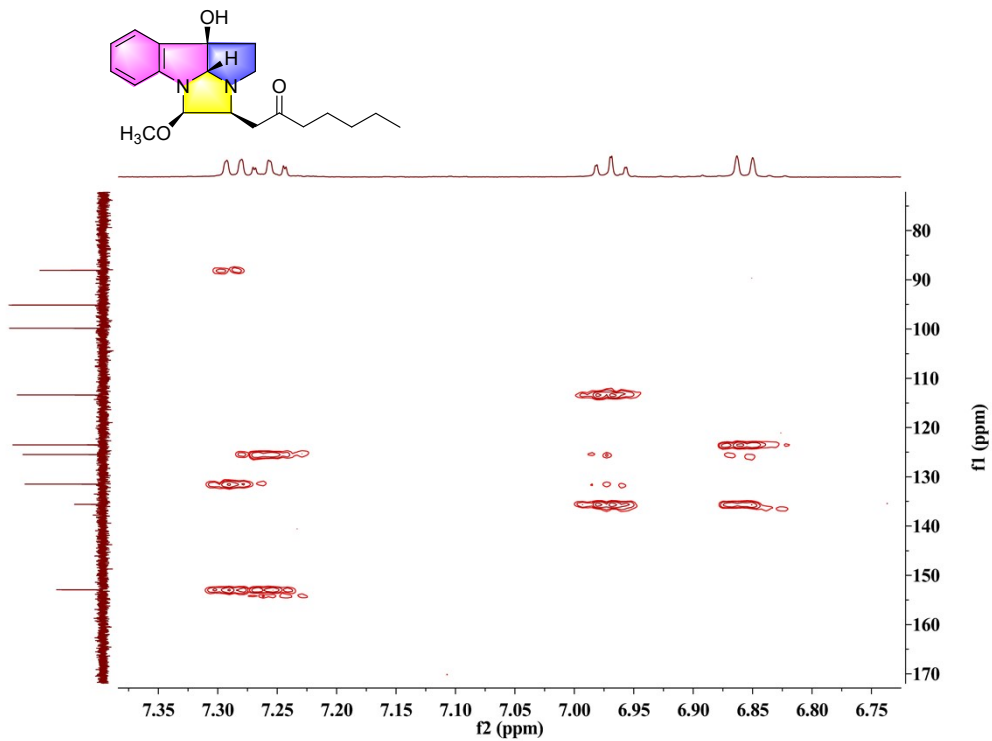

Figure S11. Locally amplified HMBC spectrum (from 6.75 to 7.35) of **1** in CD<sub>3</sub>OD

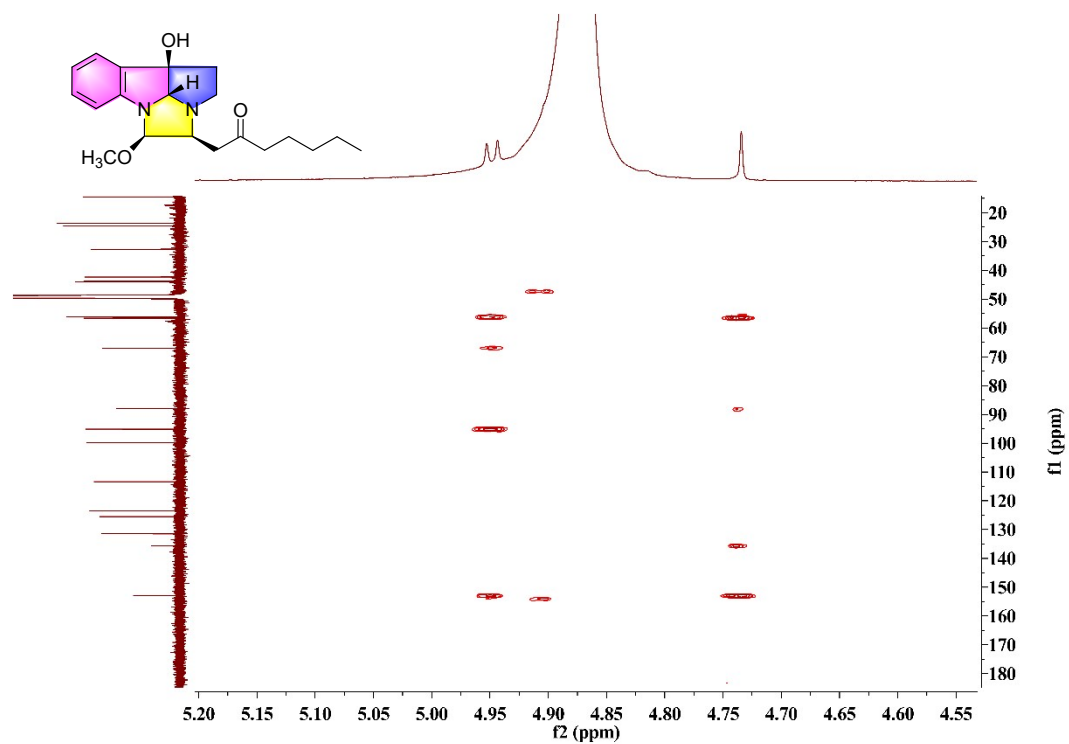

**Figure S12.** Locally amplified HMBC spectrum (from 4.55 to 5.20) of **1** in CD<sub>3</sub>OD

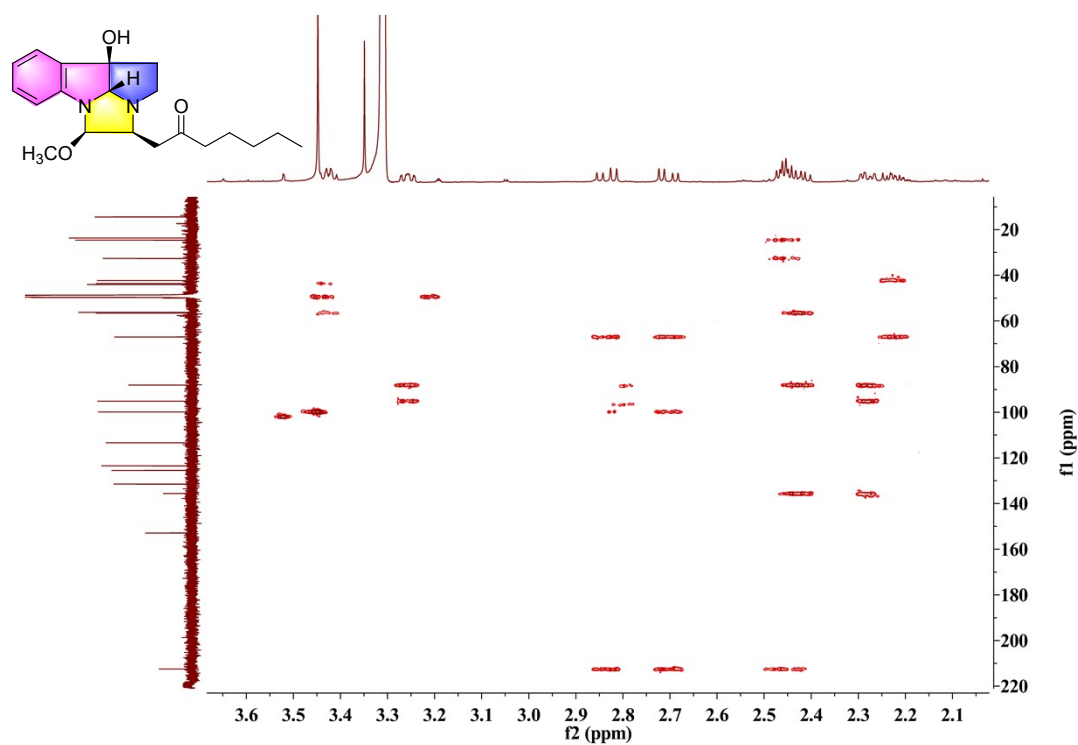

**Figure S13.** Locally amplified HMBC spectrum (from 2.10 to 3.60) of **1** in CD<sub>3</sub>OD

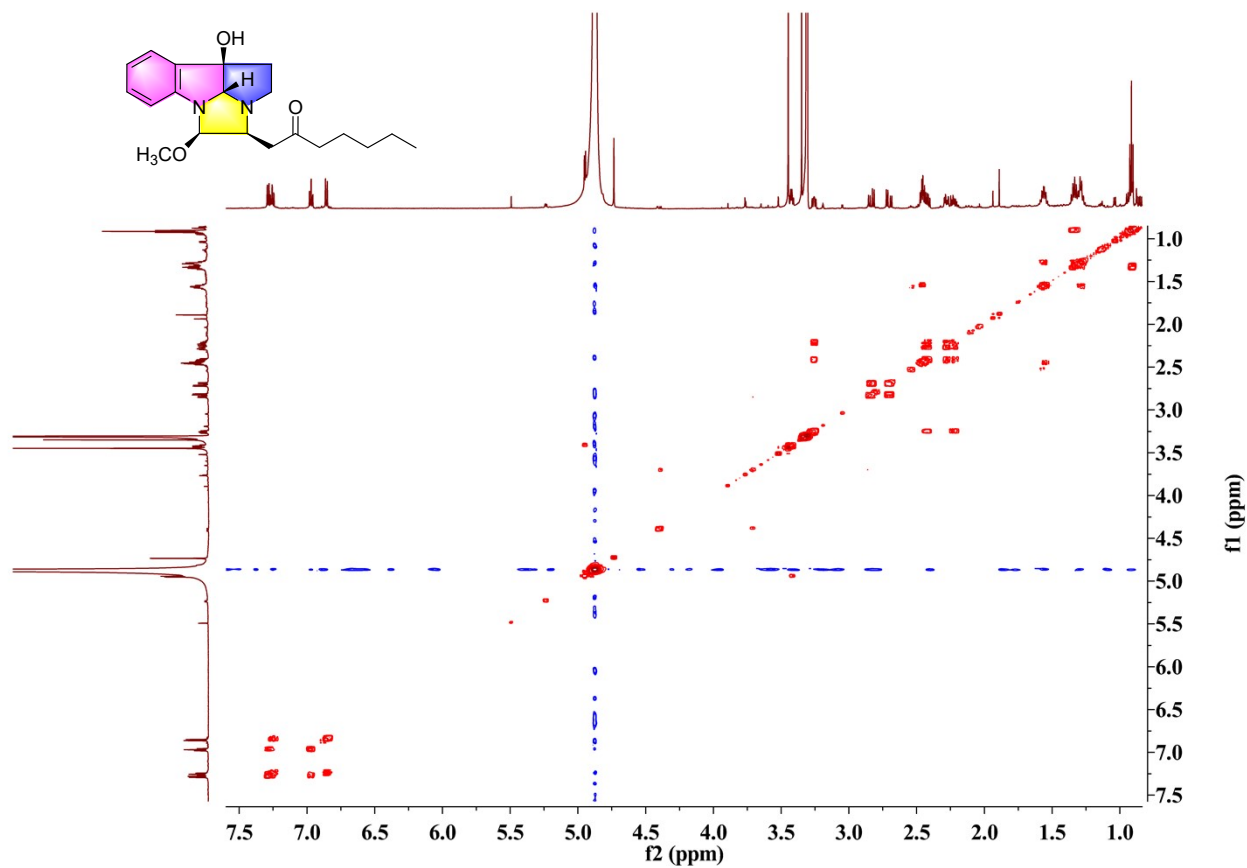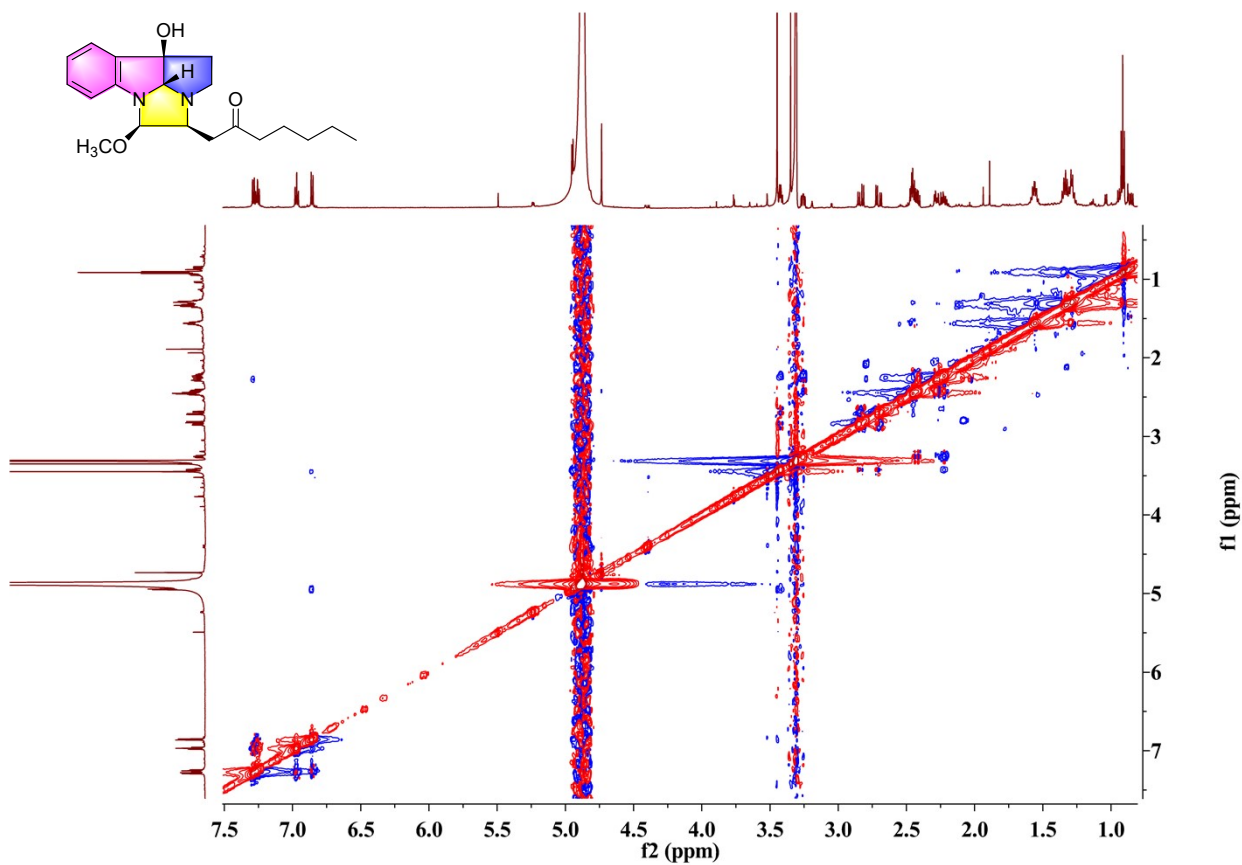

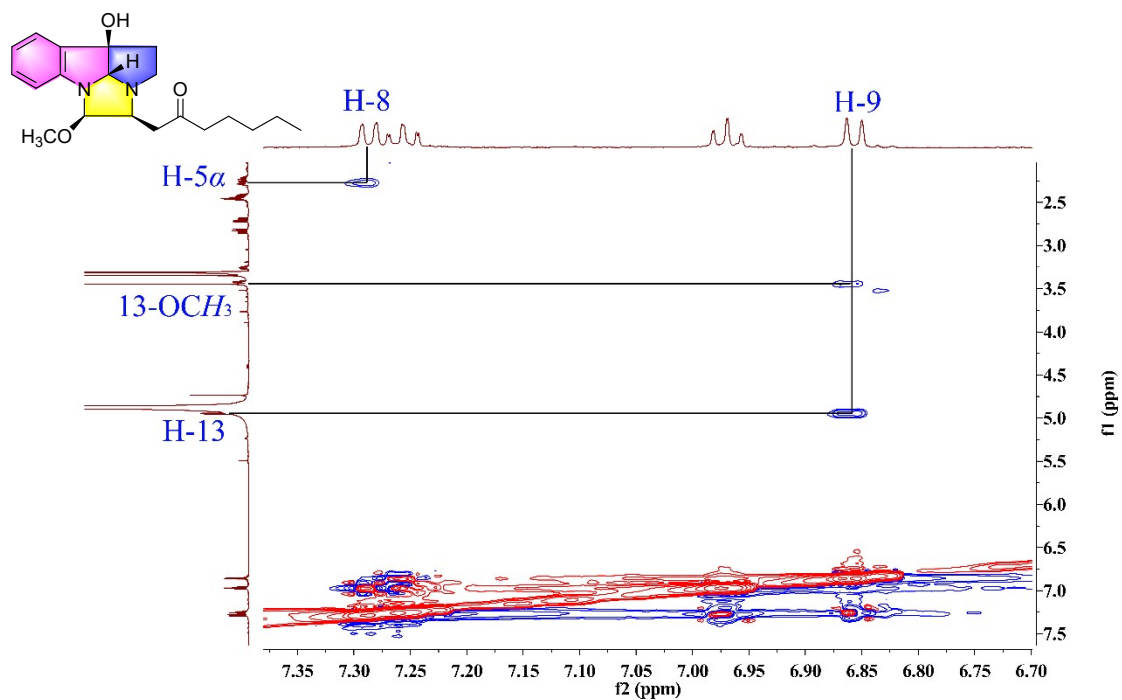

**Figure S16.** Locally amplified NOESY spectrum (from 6.70 to 7.35) of **1** in CD<sub>3</sub>OD

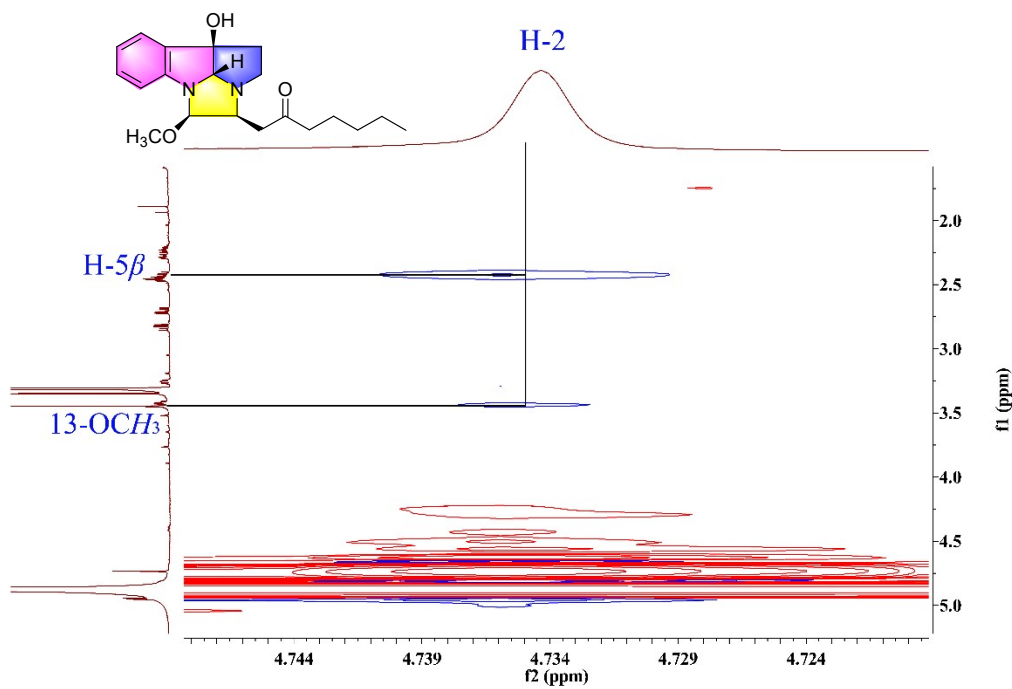

**Figure S17.** Locally amplified NOESY spectrum (from 4.72 to 4.74) of **1** in CD<sub>3</sub>OD

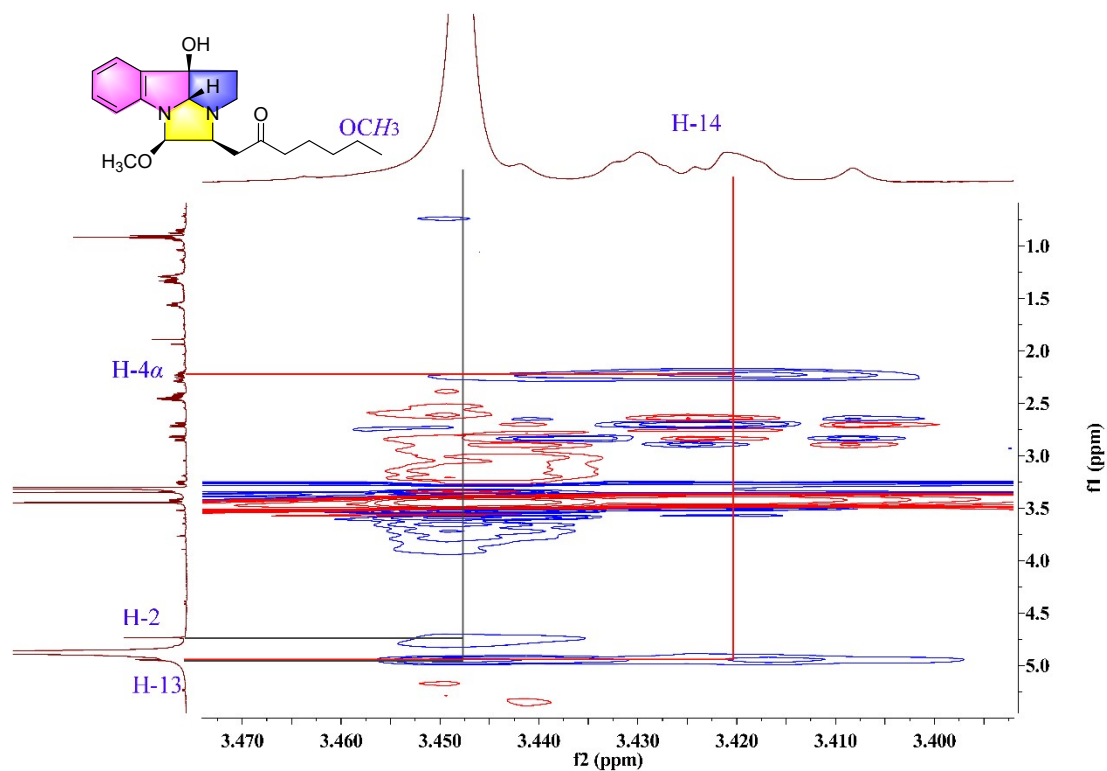

**Figure S18.** Locally amplified NOESY spectrum (from 3.40 to 3.47) of **1** in CD<sub>3</sub>OD

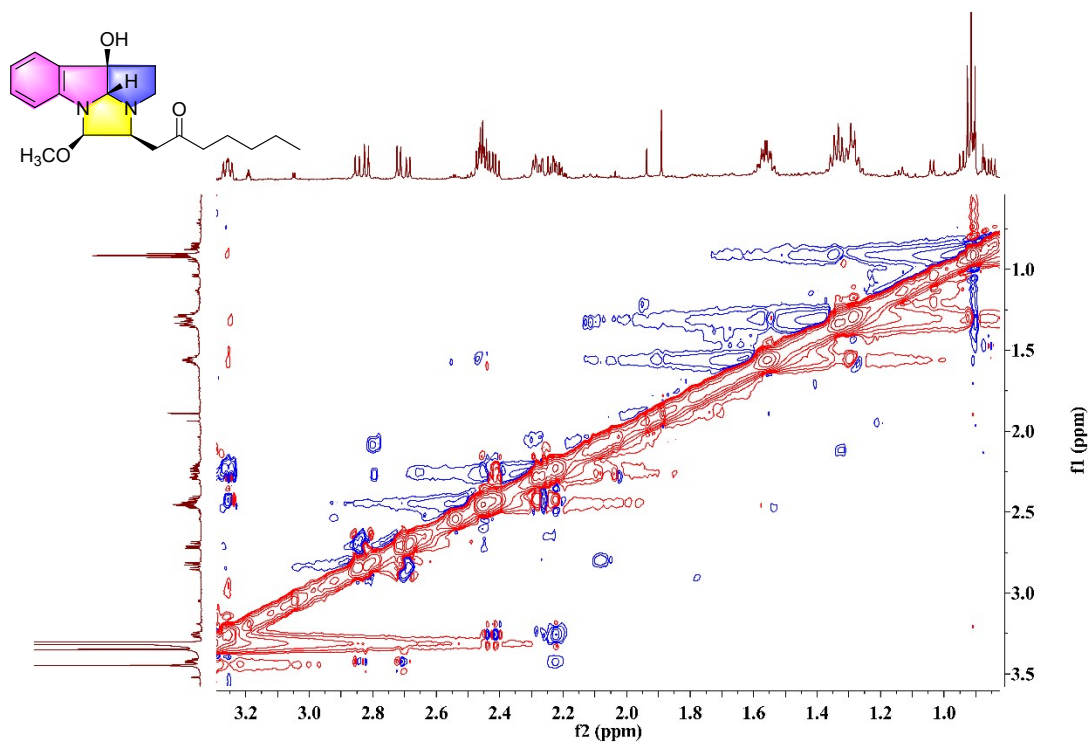

**Figure S19.** Locally amplified NOESY spectrum (from 0.90 to 3.22) of **1** in CD<sub>3</sub>OD
